## Retraction: TUSC3 induces autophagy in human non-small cell lung cancer cells through Wnt/ $\beta$ -catenin signaling

Yun Peng<sup>1</sup>, Jun Cao<sup>2</sup>, Xiao-Yi Yao<sup>3</sup>, Jian-Xin Wang<sup>4</sup>, Mei-Zuo Zhong<sup>3</sup>, Ping-Ping Gan<sup>3</sup> and Jian-Huang Li<sup>3</sup>

<sup>1</sup>International Medical Center, Xiangya Hospital, Central South University, Changsha 410008, P.R. China

<sup>2</sup>Department of Medical Oncology, The Affiliated Cancer Hospital of Xiangya School of Medicine, Central South University, Changsha 410008, P.R. China

<sup>3</sup>Department of Oncology, Xiangya Hospital, Central South University, Changsha 410008, P.R. China

<sup>4</sup>School of Information Science and Engineering, Central South University, Changsha 410008, P.R. China

**Published:** December 06, 2022

**Copyright:** © 2022 Peng et al. This is an open access article distributed under the terms of the [Creative Commons Attribution License](#) (CC BY 3.0), which permits unrestricted use, distribution, and reproduction in any medium, provided the original author and source are credited.

**This article has been retracted:** Oncotarget requested the original data for this paper to address concerns regarding image duplication. The authors were unable to retrieve the data. As a result, all authors have agreed to the retraction of this paper from Oncotarget. The University was notified about the issues with the paper.

Original article: Oncotarget. 2017; 8:52960–52974. <https://doi.org/10.18632/oncotarget.17674>
